# Supplementary material for: Conditional Knockout of Breast Carcinoma Amplified Sequence 2 (BCAS2) in Mouse Forebrain Causes Dendritic Malformation via β-catenin
Source: PubMed Central journal article supplement (PMC5054673; doi:10.1038/srep34927), 2016-10-07
Supplement: srep34927-s1.pdf [file srep34927-s1.pdf]

## Supplementary Information

### **Conditional Knockout of Breast Carcinoma Amplified Sequence 2 (BCAS2) in Mouse Forebrain Causes Dendritic Malformation via $\beta$ -catenin**

Chu-Wei Huang<sup>1</sup>, Yi-Wen Chen<sup>1</sup>, Yi-Rou Lin<sup>1</sup>, Po-Han Chen<sup>1</sup>, Meng-Hsuan Chou<sup>1</sup>,  
Li-Jen Lee<sup>2</sup>, Pei-Yu Wang<sup>3</sup>, June-Tai Wu<sup>4,5</sup>, Yeou-Ping Tsao<sup>6</sup>, Show-Li Chen<sup>1\*</sup>

| Gene-Set Name                                            | No. changed | % changed   | Z Score     | gene symbols                                                                                                                                                                                                                                                                                                                                                                                                                                             |
|----------------------------------------------------------|-------------|-------------|-------------|----------------------------------------------------------------------------------------------------------------------------------------------------------------------------------------------------------------------------------------------------------------------------------------------------------------------------------------------------------------------------------------------------------------------------------------------------------|
| mRNA processing:WP411                                    | 60          | 48.7804878  | 5.313390142 | CDC40, CELF1, CLASRP, CLK1, CLP1, CPSF2, CPSF3, CSTF2T, CSTF3, DDX1, DDX20, DHX9, DNAJC8, EFTUD2, HNRNPA2B1, HNRNPA3, HNRNPAB, HNRNPD, HNRNPH1, HNRNPH2, HNRNPU, METTL3, NCBP1, NCBP2, PAPOLA, POLR2A, PPM1G, PRMT2, PRPF3, PRPF40A, PRPF4B, PRPF8, PTBP2, RBM17, RBM39, RBM5, RBMX, RNMT, SF3A1, SF3A3, SFSWAP, SMC1A, SNRPA1, SNRPD1, SNRPD3, SPOP, SREK1, SRPK1, SRPK2, SRRM1, SRSF1, SRSF10, SRSF3, SRSF5, SRSF7, SRSF9, SUGP1, SUGP2, TRA2B, XRN2   |
| G1 to S cell cycle control:WP45                          | 35          | 51.47058824 | 4.41994258  | ATM, CCN81, CCNE1, CCNE2, CCNG2, CDC25A, CDK1, CDK2, CDK6, CDK7, CREB3L4, E2F3, E2F6, MCM2, MCM4, MCM6, MDM2, MNAT1, MYT1, ORC2, ORC3, ORC4, ORC5, ORC6, POLA2, POLE, POLE2, PRIM1, PRIM2, RB1, RBL1, RPA3, TFDP1, TFDP2, WEE1                                                                                                                                                                                                                           |
| DNA Replication:WP466                                    | 24          | 57.14285714 | 4.286960523 | CDC6, CDC7, CDK2, CDT1, GMNN, MCM2, MCM4, MCM6, ORC2, ORC3, ORC4, ORC5, ORC6, POLA1, POLA2, POLD3, POLE, POLE2, PRIM1, PRIM2, RFC1, RFC3, RPA3, UBA5                                                                                                                                                                                                                                                                                                     |
| p38 MAPK Signaling Pathway:WP400                         | 19          | 61.29032258 | 4.195451588 | ATF2, CDC42, MAP2K4, MAP2K6, MAP3K1, MAP3K5, MAP3K7, MAPK14, MAPKAPK5, MAX, MEF2D, MKNK1, RASGRF1, RIPK1, RPS6KA5, STAT1, TGFB2, TGFB1, TRAF2                                                                                                                                                                                                                                                                                                            |
| Eukaryotic Transcription Initiation:WP405                | 22          | 55          | 3.877979659 | CDK7, ERCC3, GTF2A2, GTF2E1, GTF2H2, GTF2H3, MNAT1, POLR1A, POLR1B, POLR1D, POLR1E, POLR2A, POLR2B, POLR2K, POLR3B, POLR3D, POLR3E, TAF12, TAF5, TAF6, TAF9, TBP                                                                                                                                                                                                                                                                                         |
| Cell cycle:WP179                                         | 45          | 44.55445545 | 3.837012751 | ATM, ATR, BUB1, BUB1B, BUB3, CCNA2, CCN1, CCNE1, CCNE2, CDC14A, CDC14B, CDC25A, CDC25B, CDC25C, CDC6, CDC7, CDK1, CDK2, CDK6, CHEK2, E2F3, E2F6, HDAC: HDAC2, HDAC4, HDAC7, MCM2, MCM4, MCM6, MDM2, ORC2, ORC3, ORC4, ORC5, ORC6, PRKDC, RB1, RBL1, SMAD4, SMC1A, TBC1D8, TFDP1, WEE1, YWHAB, YWHAE                                                                                                                                                      |
| EGF/EGFR Signaling Pathway:WP437                         | 57          | 41.60583942 | 3.705918962 | AP2A1, AP2B1, ATXN2, BRAF, CAV1, CDC42, EGF, EGFR, ELK4, EPS15, EPS8, ERBB2, GAB2, HGS, ITC, JAK1, JAK2, JUN, KRAS, LIMK2, MAP2K5, MAP3K1, MAP3K2, MAP3K4, MAPK14, MAPK8, MAPK9, PIAS3, PIK3C2B, PIK3R1, PLSCR1, PRKCI, PRKCZ, PTK2, PTK2B, PTPN12, RAF1, RALA, RALB, RALBP1, RALGDS, RAP1A, RASA1, REPS2, RICTOR, RPS6KA5, SH3GL2, SH3KBP1, SOS1, SOS2, STAM, STAM2, STAMBP, STAT1, STMN1, STXB1, VAV3                                                  |
| TNF alpha Signaling Pathway:WP231                        | 38          | 44.70588235 | 3.543479102 | BIRC2, CFLAR, CREBBP, CSNK2A1, CUL1, CYBA, DIABLO, FBXW11, GLUL, GLULP4, IKKBK, JUN, MADD, MAP2K4, MAP2K6, MAP3K1, MAP3K5, MAP3K7, MAP4K2, MAPK8, MAPK9, NFKB1, PPP2CA, PRKCZ, PSMD2, PYGL, RAF1, REL, RFX, RIPK1, SKP1, SMPD2, SOS1, TAB2, TAB3, TANK, TBK1, TRAF2                                                                                                                                                                                      |
| DNA damage response:WP707                                | 32          | 45.07042254 | 3.301377248 | ATM, ATR, ATRIP, BRCA1, CCN1, CCNE1, CCNE2, CDC25A, CDC25C, CDK1, CDK2, CDK5, CDK6, CHEK2, CYCS, FANCD2, MDM2, NBN, NPAT, PIDD, PRKDC, RAD1, RAD52, RAD9A, RB1, RFC1, RRM2B, SESN1, SMC1A, TLK1, TLK2, TREX1                                                                                                                                                                                                                                             |
| MAPK signaling pathway:WP382                             | 61          | 38.85350318 | 3.190854313 | AC013461.1, ACVR1B, AKT2, ARRB1, ATF2, BRAF, CASP2, CASP6, CDC25B, CDC42, DUSP10, EGF, EGFR, IKKBK, JUN, KRAS, LAMTOR3, MAP2K4, MAP2K5, MAP2K6, MAP3K1, MAP3K13, MAP3K4, MAP3K5, MAP3K6, MAP3K7, MAP4K3, MAP4K4, MAPK10, MAPK14, MAPK8, MAPK9, MAPKAPK5, MAPT, MAX, MRAS, NF1, NFKB1, PAK2, PPM1B, PPP3CB, PPP3CC, PPP3R1, PRKCH, PRKCZ, PTPRR, RAF1, RAP1A, RASA1, RASA2, RASGRF2, RASGRP1, SOS2, STK3, STMN1, TAB2, TGFB2, TGFB1, TMEM37, TRAF2, TRAF6 |
| Insulin Signaling:WP481                                  | 61          | 38.36477987 | 3.071210199 | AKT2, ARHGAP33, CAP1, CBLB, CYTH3, ENPP1, FLOT2, GRB10, GRB14, IGF1R, IKKBK, INPP4A, INSR, IRS1, JUN, MAP2K4, MAP2K5, MAP2K6, MAP3K1, MAP3K13, MAP3K2, MAP3K4, MAP3K5, MAP3K6, MAP3K7, MAP4K2, MAP4K3, MAP4K4, MAPK10, MAPK14, MAPK8, MAPK9, MAPKAPK5, MAPT, MAX, MRAS, NF1, NFKB1, PAK2, PPM1B, PRKCH, PRKCI, PRKCZ, RAB4A, RAF1, RAPGEF1, RHOQ, RPS6KA4, RPS6KA5, SGK1, SGK3, SLC2A1, SNAP23, SNAP25, SOS1, SOS2, STXB1, STXB3, STXB4, TSC1, TSC2      |
| TCA Cycle:WP78                                           | 17          | 51.51515152 | 3.069553505 | CS, DLD, DLST, FH, IDH3A, IDH3B, ITGA6, MDH2, OGDH, PDHB, PDK1, PDK4, PDP1, RP4-682C21.2, SDHA, SDHD, SUCLG2                                                                                                                                                                                                                                                                                                                                             |
| TGF beta Signaling Pathway:WP366                         | 46          | 40          | 2.993468427 | ATF2, CAV1, CDC42, CDK1, COPSS, CUL1, DCP1A, ETS1, FOXP3, HDAC1, HGS, ITC, ITGA6, JUN, LIMK2, MAP2K4, MAP2K6, MAP3K7, MAPK14, MAPK8, MAPK9, MEF2A, NUP214, PAK2, PDK1, PIK3R1, PTK2, RAF1, RBL1, RNF111, SKIL, SKP1, SMAD4, SNIP1, SOS1, SPTBN1, SUMO1, TERT, TFDP1, TGFB1, TGIF1, TRAF6, UCHL5, WWP1, ZFYVE1, ZFYVE9                                                                                                                                    |
| Fatty Acid Biosynthesis:WP357                            | 12          | 54.54545455 | 2.820910874 | ACAA2, ACACB, ACSL1, ACSL3, ACSL6, DECR1, ECH1, ECHDC1, ECHDC2, MECR, PECR, SCD                                                                                                                                                                                                                                                                                                                                                                          |
| Androgen receptor signaling pathway:WP138                | 34          | 41.46341463 | 2.815274022 | BAG1, BRCA1, CAV1, CCNE1, CDC42, CREBBP, CTNNB1, DSTN, EGFR, GNB2L1, HDAC1, JUN, KAT2B, KDM1A, LIMK2, MDM2, NCOA1, PARK7, PIAS3, PIK3R1, PPAP2A, PTK2, RAD9A, RAN, RB1, RNF14, RNF4, ROCK1, ROCK2, SMAD4, SMARCE1, SUMO1, UBE3A, ZMIZ1                                                                                                                                                                                                                   |
| FAS pathway and Stress induction of HSP regulation:WP314 | 17          | 47.22222222 | 2.629045898 | CASP6, CFLAR, CYCS, DFFA, FAF1, JUN, LMNB1, MAP2K4, MAP3K1, MAP3K7, MAPK8, MAPKAPK3, PAK2, PARP1, PRKDC, RB1, RIPK2                                                                                                                                                                                                                                                                                                                                      |
| TSH signaling pathway:WP2032                             | 27          | 42.1875     | 2.611358818 | APEX1, BRAF, CCNE1, CDK2, GNAI3, GNAI2, GNAI3, GNAQ, GNB1, IGF1R, IAK1, JAK2, JUN, KCNIP3, MAP2K6, MAPK14, MTOR, PAX8, PDE4D, PIK3CA, PIK3R1, RAF1, RALG1, RAP1A, RB1, STAT1, TTF1                                                                                                                                                                                                                                                                       |
| DNA damage response (only ATM dependent):WP710           | 34          | 40          | 2.562474079 | APC, ATM, BCL2L11, BCL6, CCNG2, CDC42, CTNNB1, DVL2, ERBB2, HMGB1, INSR, IRS1, ITGA6, JUN, LDLR, MAP3K1, MAP3K4, MAP3K7, MAPK10, MAPK8, MAPK9, MDM2, MLKL, NPAT, PCK2, PDK1, PPP2R5C, PPP2R5E, RAC1, SCP2, SMAD4, SOS1, SOS2, WNT2B                                                                                                                                                                                                                      |
| B Cell Receptor Signaling Pathway:WP23                   | 36          | 39.13043478 | 2.479800873 | ATF2, BCL6, BLNK, BRAF, CARD11, CD22, CDC42, DAPP1, E2F3, ETS1, GAB2, GTF2I, IKKBK, ILF2, IRF4, JUN, MALT1, MAP2K6, MAP3K7, MAPK14, MAPK8, MAPK9, MAX, MEF2D, NFATC3, NFKB1, PIK3R1, PTPN18, RAF1, RAPGEF1, RASGRP3, REL, SH3BP2, SOS1, SYK, TEC                                                                                                                                                                                                         |
| Mitochondrial LC-Fatty Acid Beta-Oxidation:WP368         | 9           | 52.94117647 | 2.329848841 | ACADM, ACSL1, ACSL3, EHHADH, HADHA, PEGR, RPL4, SCP2, SLC25A20                                                                                                                                                                                                                                                                                                                                                                                           |
| Glycogen Metabolism:WP500                                | 15          | 45.45454545 | 2.288141039 | AGL, PHKA1, PHKB, PHKG1, PPP2CA, PPP2R2A, PPP2R2C, PPP2R3A, PPP2R5A, PPP2R5C, PPP2R5D, PPP2R5E, PYGB, PYGL, UGP2                                                                                                                                                                                                                                                                                                                                         |
| Integrated Breast Cancer Pathway:WP1984                  | 25          | 39.68253968 | 2.142354953 | AHR, BMPR1A, BRCA2, CDC25A, CDC42, CDK7, CERK, DAG1, HDAC1, HMGR, IRS1, JUN, KRAS, MTOR, MYCBP2, RALGAP1, RAP1A, RASGRP3, SMEK1, SMEK2, STK11, TSC2, USP38, VEGFA                                                                                                                                                                                                                                                                                        |

**Supplementary Table S1.** The affected genes from exon array analysis of BCAS2-depleted MCF7 cells. RNAs were isolated from MCF7 cells transfected with shBCAS2#1 or pSUPER vector (control) for 48hr. RNA quality was proven by capillary electrophoresis (data not shown) before analyzed by exon arrays. % change is defined by the percentage of alternatively regulated genes in each category when depleting BCAS2 compared with control. The Z-score is defined by calculating the difference between observed and expected number of genes and dividing the difference by the standard deviation of observed number of genes. The data were analyzed by AltAnalyze software from two independent experiments (<http://www.altanalyze.org/help.html>).

| <b>Antibody</b> | <b>Company &amp; Cat. No.</b> | <b>Antibody</b>  | <b>Company &amp; Cat. No.</b> |
|-----------------|-------------------------------|------------------|-------------------------------|
| Cre recombinase | Abcam; ab190177               | V5               | Sigma Aldrich; V8137          |
| NeuN            | Millipore; MABN140            | $\beta$ -actin   | Sigma-Aldrich; A5441          |
| MAP2            | Millipore; MAB3418            | BCAS2            | Proteintech; 10414-1-AP       |
| Dcx             | Millipore; AB2253             | $\beta$ -catenin | BD; 610154                    |
| GFAP            | Sigma Aldrich; G3893          | Dll1             | Santa Cruz; sc-9102           |
| IBA-1           | GeneTex; GTX101495            | anti-mouse IgG   | Sigma Aldrich; A9044          |
| Sox2            | Abcam; ab79351                | anti-Rabbit IgG  | Sigma Aldrich; A0545          |
| Phalloidin      | Sigma Aldrich; P1951          | Flag             | BIO-RAD; MCA4764GA            |
| Brdu            | Abcam; ab6326                 | Flag (WB)        | Sigma Aldrich; F3040          |
| V5 (WB)         | Invitrogen; 46-0705           |                  |                               |

**Supplementary Table S2. Antibody lists.**

| PCR Primer                | Sequence (5' to 3')       | PCR Primer                | Sequence (5' to 3')     |
|---------------------------|---------------------------|---------------------------|-------------------------|
| CU                        | CAAGAACAGGTATCACTCACGAG   | Dll1 R                    | CCCCAATGATGCTAACAGAAACG |
| FD                        | ACATTATAGCGAATCTTTTCCC    | GAPDH F                   | TGCCAAGGCTGTGGGCAAGG    |
| Cre_F                     | TCTGATGAAGTCAGGAAGAACC    | GAPDH_R                   | TGTTGGGGGCCGAGTTGGGA    |
| Cre_R                     | GAGATGTCCTTCACTCTGATT     | mBCAS2_F                  | CCGGATTATTCTGCCTTTGA    |
| $\beta$ -catenin_F        | GCGTGGACAATGGCTACTCAAG    | mBCAS2_R                  | ATGTTCTTTTCGCTGCCAGTT   |
| $\beta$ -catenin_R        | GTCATTGCATACTGCCCGTCAA    | BCAS2_F                   | AAAGACTGGCTGCTCGAC      |
| Dll1_F                    | GGTACTGCGAGGACAATGTGG     | BCAS2_R                   | AGATCCAGCTGTGAGTTG      |
| qPCR Primer               | Sequence (5' to 3')       | qPCR Primer               | Sequence (5' to 3')     |
| q $\beta$ -actin_F        | GTTGTCGACGACGAGCG         | qm $\beta$ -cateninE3E4_R | TAGCGTCTCAGGGAACATGGC   |
| q $\beta$ -actin_R        | GCACAGAGCCTCGCCTT         | qm $\beta$ -cateninI2E3_F | CAATGGGTCATTGTCTGTAG    |
| qBCAS2_F                  | TCCAGCTGTGAGTTGCATGT      | qm $\beta$ -cateninI2E3_R | TGGCTGACAGCAGCTTTTCTG   |
| qBCAS2_R                  | CACAGCATGGATGTAATGCC      | qDLL1E4E4_F               | AACCCAGAAAAGACTCATCAGC  |
| qHistone3_F               | ATCCGCCGCTACCAGAAGT       | qDLL1E4E4_R               | AGGGTTGCACACTTTCTCC     |
| qHistone3_R               | CCGCTGGAAGGGCAACT         | qDLL1E6E7_F               | TATCCGCTATCCAGGCTGTC    |
| q $\beta$ -cateninE3E4_F  | GGATTTTCTCAGTCCTCACTCAAG  | qDLL1E6E7_R               | GGGTCACACTCGTCAATCC     |
| q $\beta$ -cateninE3E4_R  | TGAGCTCGAGTCATTGCATACTGT  | qDLL1I3E4_F               | GAACCAACCAGGAGCATCTT    |
| q $\beta$ -cateninI3E4_F  | GCTGAACTGTGGATAGTGAGTGTTG | qDLL1I3E4_R               | GTAGGAGTACTTGAGGTCCGT   |
| q $\beta$ -cateninI3E4_R  | TGAGCTCGAGTCATTGCATACTG   | qDLL1I8E8_F               | AGCTCTTACCCTGTTCTAATG   |
| qNanog_F                  | ATGCGGACTGTGTCTCTCA       | qDLL1I8E8_R               | ACTCGAGGTCACACAAATG     |
| qNanog_R                  | GCAATGGATGCTGGGATACT      | qGAPDH_F                  | CATGGCCTTCCGTGTTCTT     |
| qm $\beta$ -cateninE3E4_F | GTTGACACCTCCCAAGTCCT      | qGAPDH_R                  | GCGGCACGTCAGATCCA       |
| RNAi                      | Sequence (5' to 3')       | shRNA                     | Sequence (5' to 3')     |
| Ctrl siRNA                | TTCTCCGAACGTGTACAGTdTdT   | shmb2#1                   | CTCGACAACCGATTGAA       |
| si $\beta$ -catenin       | ACCATGCAGAATACAAATGATdTdT | shmb2#2                   | CCATGGACTATGTAAACTGTT   |

**Supplementary Table S3. Primer and RNAi target sequences.**

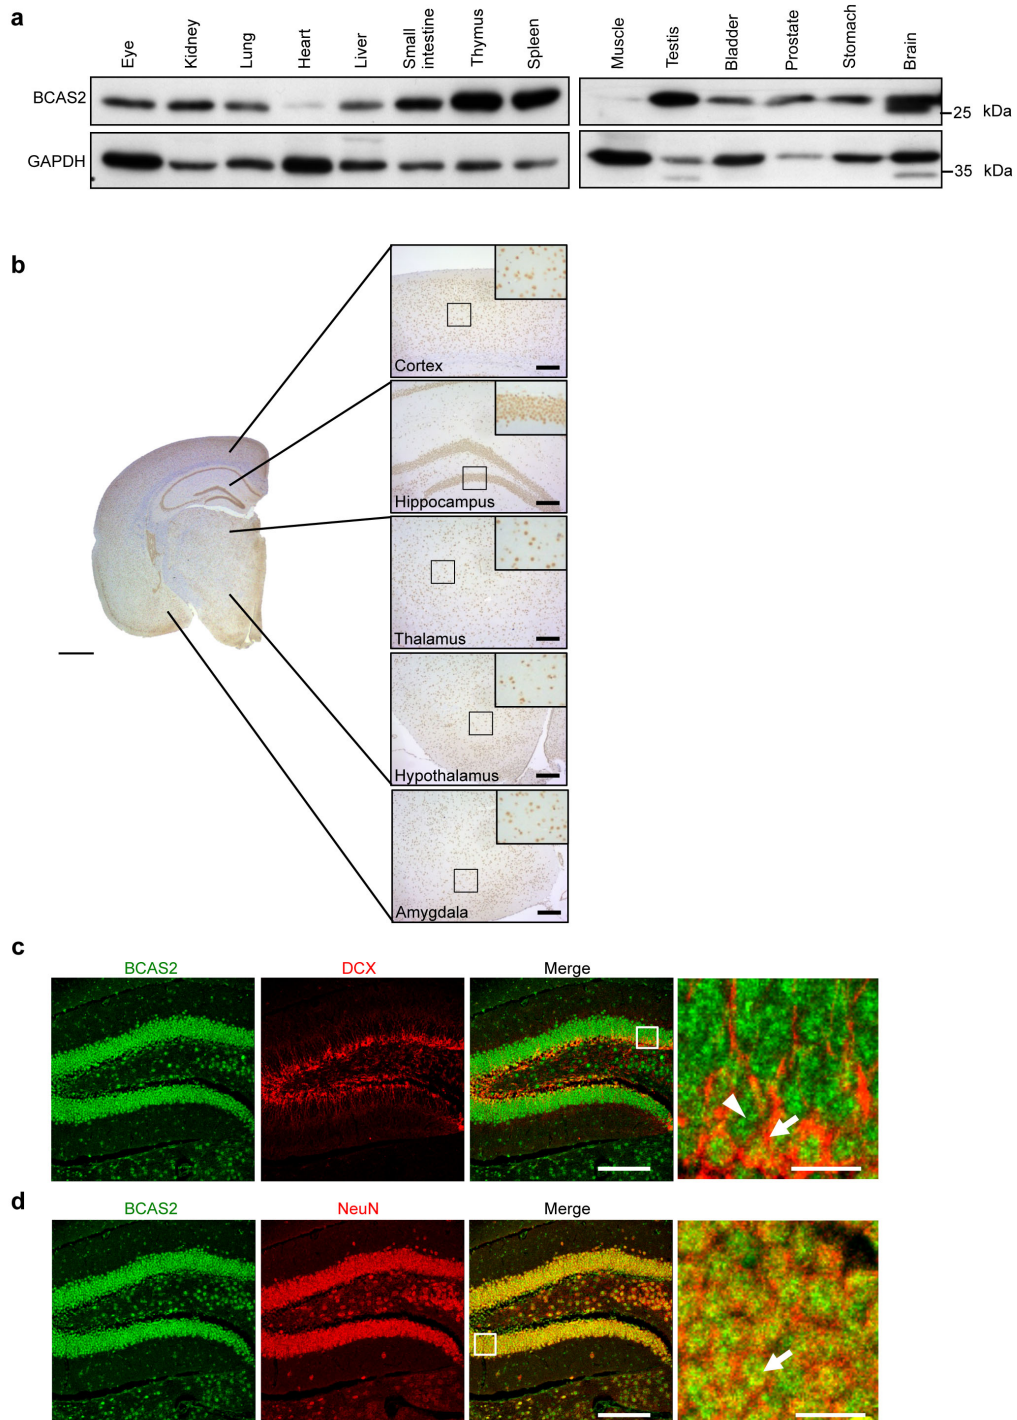

**Supplementary Figure S1. Expression of BCAS2 in WT mice.** (a) Western blot analysis of the BCAS2 protein expression in various tissues at age 12 weeks. (b) IHC of the BCAS2 expression in 4- $\mu$ m forebrain paraffin sections of WT mice at 12 weeks of age with counterstaining by hematoxylin. Scale bar: left: 1 mm, right: 200  $\mu$ m. (c)

BCAS2 is co-expressed with DCX. BCAS2 was expressed in the nucleus (white arrowhead), and DCX was expressed in the cytoplasm of neuroblasts/immature neurons in the inner cell layer of the DG (white arrow). **(d)** BCAS2 co-expression with NeuN in the nuclei of mature neurons in the hippocampus shown by confocal microscopy (white arrow). Scale bars: 200  $\mu\text{m}$  in the main panels and 20  $\mu\text{m}$  in the enlarged panels. Uncropped blots are presented in Supplementary Figure S6.

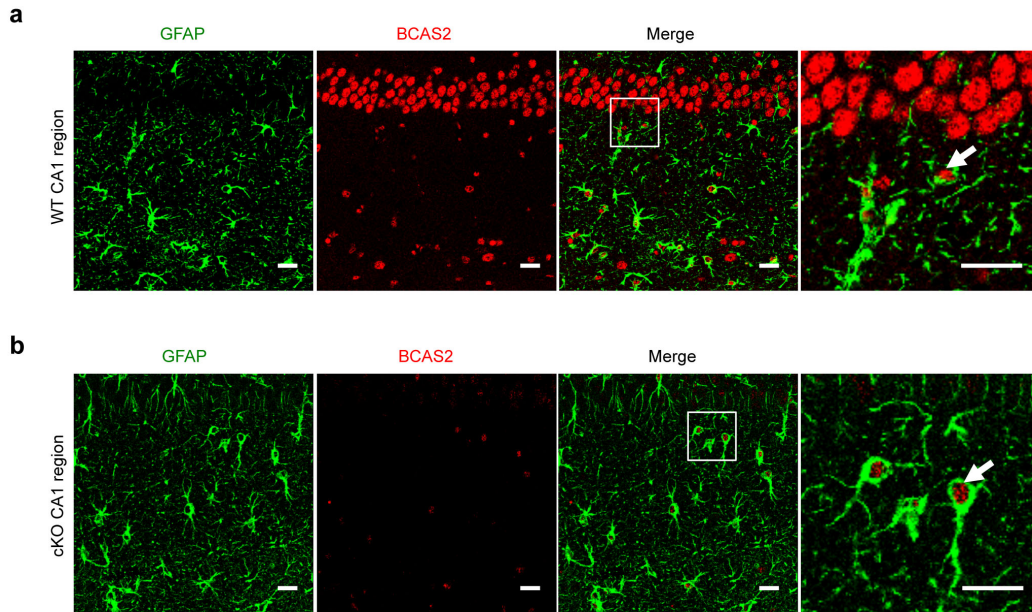

**Supplementary Figure S2. BCAS2 can be detected in GFAP astrocytes in both WT and cKO mice.** Immunofluorescence analysis of 4- $\mu$ m forebrain paraffin sections was performed with anti-BCAS2 (red) and GFAP (green) antibodies in coronal sections for the genotypes. The GFAP<sup>+</sup> astrocytes in CA1 of 12-week-old WT (**a**) and cKO mice (**b**) are indicated by arrows. Images were obtained using confocal microscopy. Scale bars: 20  $\mu$ m.



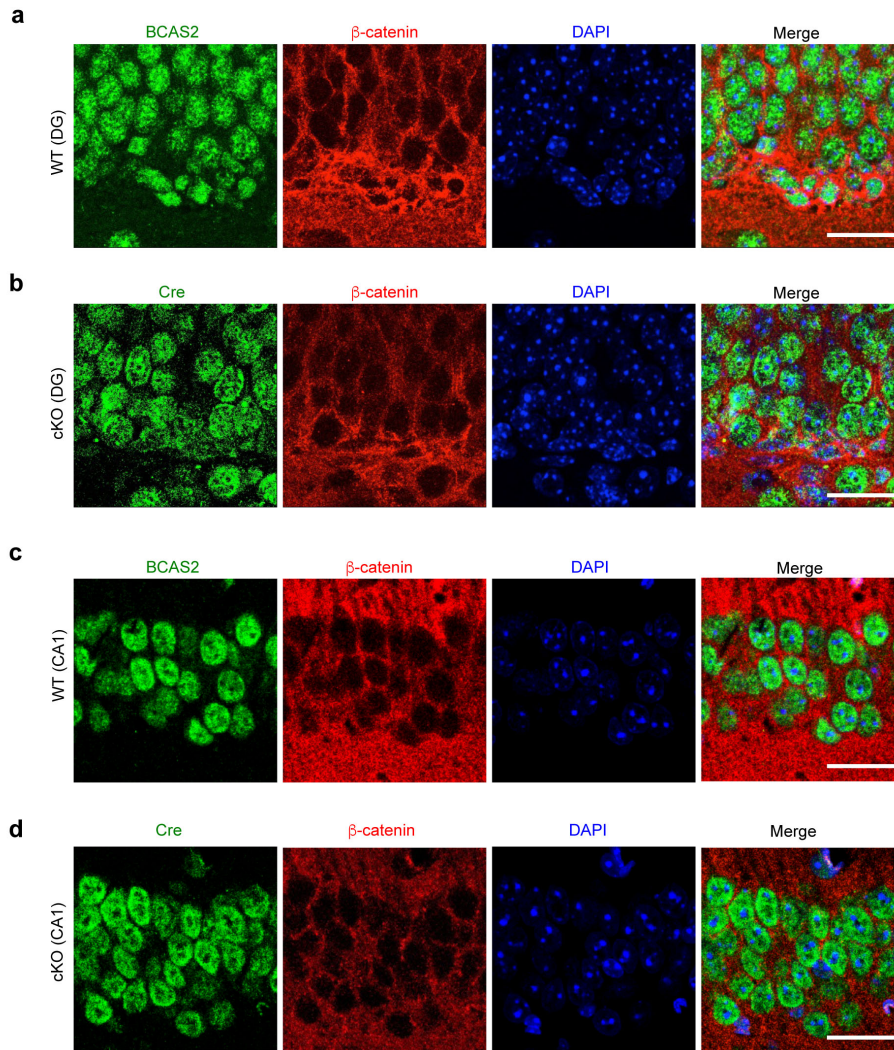

**Supplementary Figure S3. BCAS2 knockout resulted in a reduction in  $\beta$ -catenin in the hippocampus.** (a) Coexpression of BCAS2 and  $\beta$ -catenin in the DG of WT mice. The 4- $\mu$ m forebrain paraffin sections were examined using IFA with anti- $\beta$ -catenin and anti-BCAS2 antibodies. Green: BCAS2. Red:  $\beta$ -catenin. (b) Lower expression of  $\beta$ -catenin detected in the DG of BCAS2 cKO mice compared to (a). (c) Coexpression of BCAS2 and  $\beta$ -catenin in the CA1 of WT mice. (d) Lower expression of  $\beta$ -catenin detected in the CA1 of BCAS2 cKO mice compared to (c). Green:



BCAS2 or Cre. Red:  $\beta$ -catenin. Images were obtained using confocal microscopy.

Scale bars: 20  $\mu$ m.

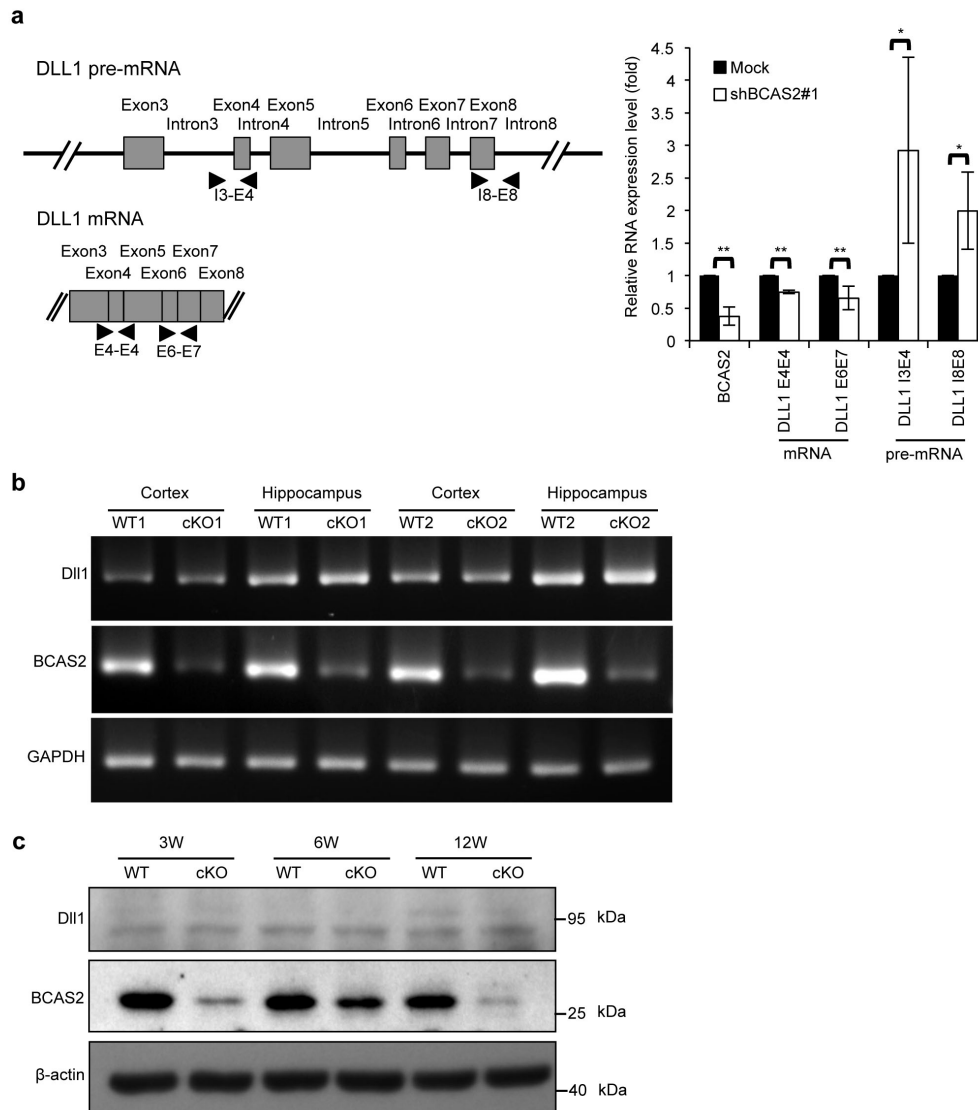

**Supplementary Figure S4. BCAS2 regulates the expression of *Delta* in human cell lines but not in mice.** (a) BCAS2 knockdown causes increased *Delta* pre-mRNA and reduced *Delta* mRNA levels in MCF7 cells. Left: schematic representation of the design of primers for detecting the intron-containing precursor mRNA (upper) and mRNA of *Delta* (lower). Primers, exons and introns are shown by arrowheads, boxes and lines, respectively. Right: quantitative PCR showing the expression of pre-mRNA and mRNA of *Delta*. The data are the mean  $\pm$  SD relative to controls from 3 independent experiments. \* $P < 0.05$ , \*\* $P < 0.01$  by Student's *t*-test. (b) RT-PCR

analysis of the *Delta* mRNA expression in the hippocampal and cortical tissues of WT and cKO mice (12-week-old). (c) Western blot showing the Delta protein expression from the forebrain tissues for each genotype at 3, 6 and 12 weeks of age. Uncropped blots and DNA gels are presented in Supplementary Figure S6.

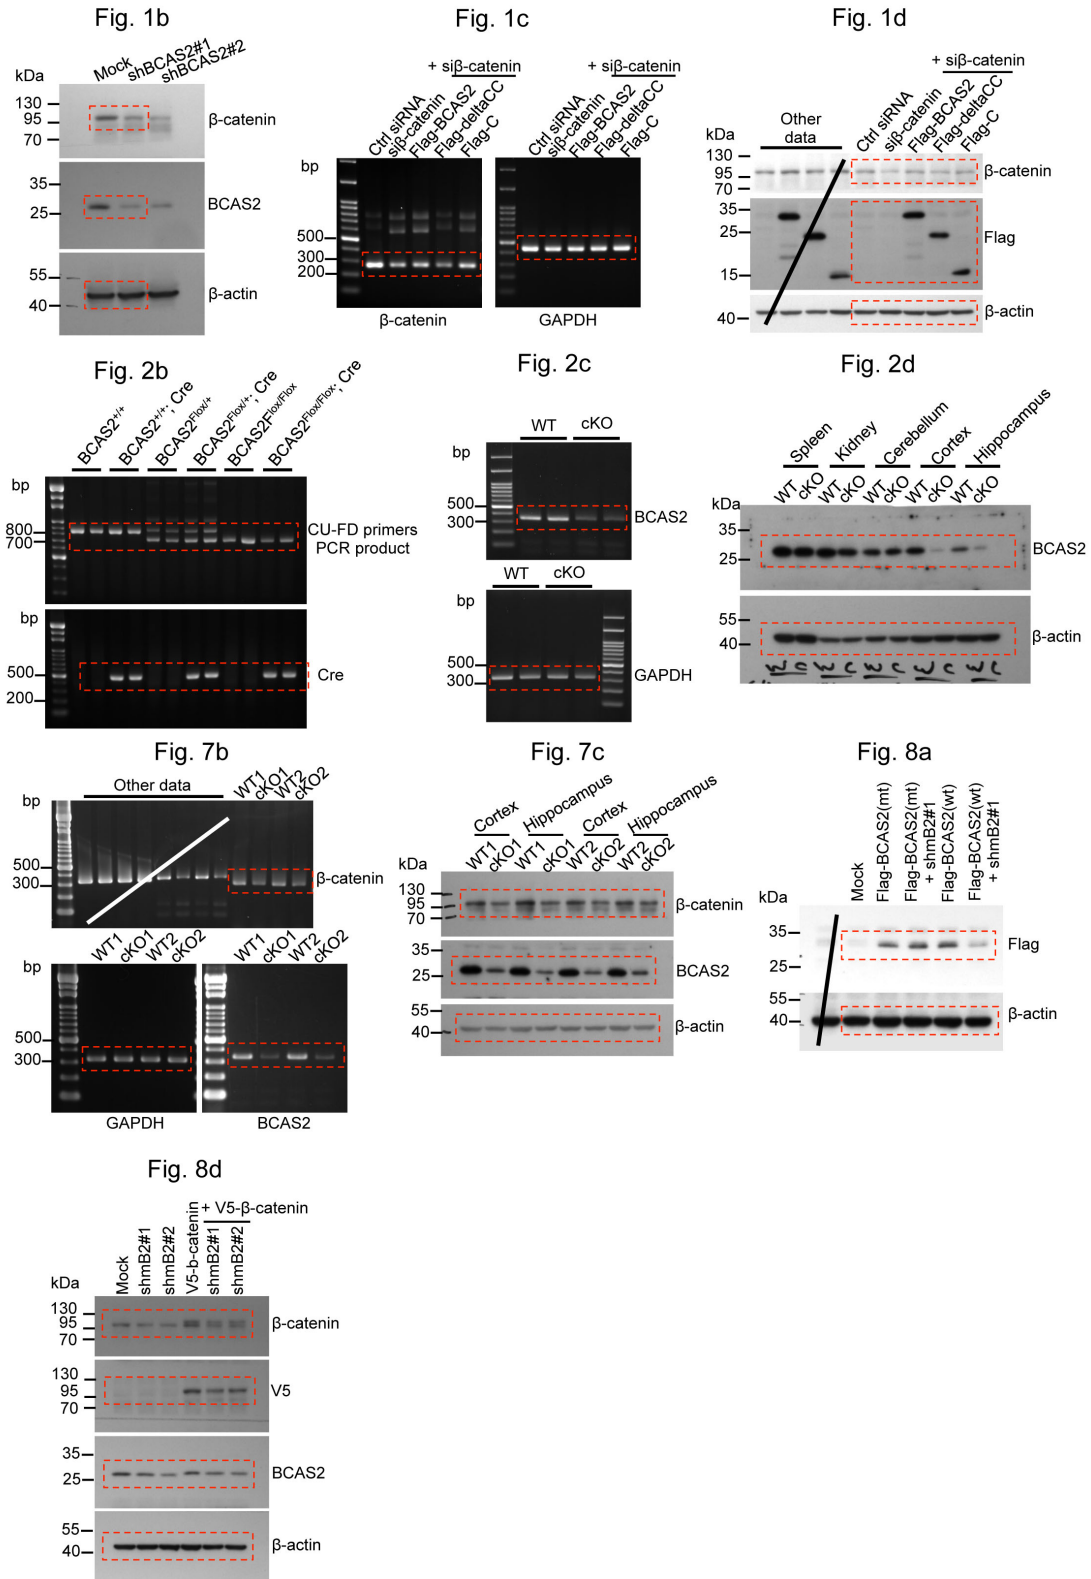

**Supplementary Figure S5. Uncropped western blot membranes and DNA gels.**

Uncropped original pictures of the western blot and DNA gels presented in the

indicated main figures. The red dotted boxes indicate cropped regions. Western blot membranes were often cut in different pieces according to the molecular weight of the target proteins that were blotted with different antibodies within one membrane separately.

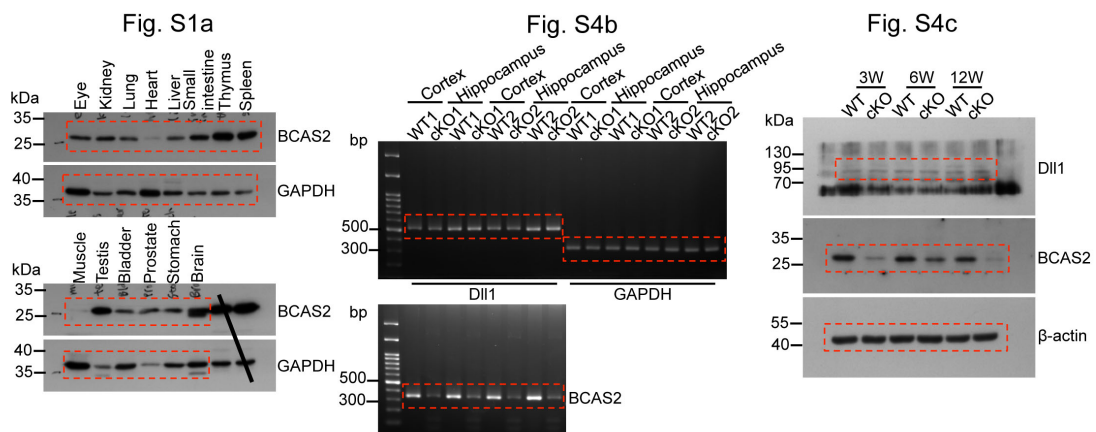

**Supplementary Figure S6. Uncropped western blot membranes and DNA gels.**

Uncropped original pictures of western blot and DNA gels presented in the indicated supplementary figures. The red dotted boxes indicate cropped regions. Western blot membranes were often cut in different pieces according to the molecular weight of the target proteins that were blotted with different antibodies within one membrane separately.
